# Supplementary material
Source: publisher figshare collection journal article supplement (https://sage.figshare.com/ndownloader/files/22782095)
Supplement: Supplementary file 1 [file 22782095]

## Sheet: DEG-edgeR
	logFC	logCPM	PValue	FDR
BC064078	9.02302	2.89069	0.000218375	0.0275715
Cxcr5	6.91677	2.88127	0.000187395	0.0251249
Nhlh2	6.50098	3.8175	0.000574823	0.0495765
Clec4e	5.89785	4.66979	2.27e-05	0.00713716
Sema7a	5.8472	4.00994	0.000371443	0.0370879
Treml4	5.68579	4.71578	1.94e-05	0.00641411
Retnlg	5.67539	5.84678	6.02e-06	0.00335258
Krt80	5.40821	4.92341	7.62e-06	0.00373211
Adgre5	5.34005	7.79257	4.58e-07	0.000676131
Plac8	5.3255	5.7883	3.76e-05	0.00974983
Gapt	5.18475	4.45354	0.000106305	0.0173589
Ace	5.11946	7.23476	5.1e-05	0.011768
Gpr141	4.95215	4.90381	9.85e-05	0.0172292
Klra2	4.88036	5.25911	6.15e-05	0.0134443
Slamf7	4.83153	4.79137	0.000235967	0.0291908
Itgal	4.73316	7.33452	8.55e-05	0.015705
Flt1	4.59937	4.72916	0.000183735	0.0250023
S100a6	4.58435	4.88696	3.31e-05	0.00943788
Cd300lb	4.58383	4.9993	7.48e-05	0.0146031
Dock5	4.5803	6.36986	2.37e-06	0.00170951
Rara	4.55698	6.40124	0.000105571	0.0173589
Ifitm6	4.54994	4.4369	0.000341739	0.0354764
Olfm1	4.43919	4.56341	0.000267616	0.0312143
Cytip	4.39831	6.54048	8.21e-06	0.00373211
Pi16	4.36943	4.71004	1.73e-05	0.00603739
Tgfbr3	4.32023	4.08106	0.000139345	0.021221
F5	4.29506	6.86522	0.000153195	0.0225352
Gm21188	4.25963	5.4232	0.000315495	0.034152
Fxyd5	4.25186	6.59725	1.75e-06	0.00146212
G0s2	4.22008	5.39686	6.51e-05	0.0136639
Cyp4f18	4.21662	5.16831	0.000450436	0.0427358
Fgr	4.1593	6.34861	4.43e-05	0.0110749
Ccr2	4.15737	6.67633	2.66e-05	0.00774771
Rhox8	4.15136	6.47483	0.00049343	0.0450973
Ciita	4.14244	6.1446	8.24e-07	0.00100918
Bhlhe40	4.06792	4.93553	8.2e-06	0.00373211
Vim	4.05621	8.62829	1.46e-08	5.97e-05
Lgals3	4.04806	6.05886	1.01e-05	0.00427859
Kif14	4.01843	4.1825	0.000283831	0.0324867
Gda	4.0179	6.52654	2.56e-07	0.00046762
Plbd1	4.00708	6.50293	1.91e-06	0.00146212
Vav3	3.98677	4.70143	0.000181324	0.0249513
Pla2g7	3.96255	5.86857	1.92e-05	0.00641411
Ccdc88c	3.93882	7.51956	4.97e-07	0.000676131
Adam19	3.93638	5.45341	3.44e-05	0.0095798
Alcam	3.92104	4.44	0.000299489	0.033344
Slfn1	3.8856	4.66891	0.000188739	0.0251249
Plcb1	3.86686	4.83967	0.000401558	0.0390308
Ahnak	3.84288	9.65348	0.000137855	0.021221
Ifi27l2a	3.83595	4.85395	1.68e-05	0.00603739
Ezr	3.81181	6.75322	1.18e-08	5.97e-05
Cd44	3.80934	7.39489	0.000124549	0.0198097
Runx3	3.80865	5.29577	0.000122804	0.0197892
Adam8	3.78834	5.67628	1.59e-05	0.00589518
Itgb7	3.77267	6.02781	6.26e-05	0.0134443
Cdr2	3.72898	4.45289	0.000354598	0.0361896
Xdh	3.69476	6.67499	4.27e-06	0.00270625
Ifitm2	3.69113	4.99823	0.00037674	0.0372092
Emilin2	3.6851	6.95811	0.000311115	0.034152
Glipr2	3.68245	4.9655	0.000292421	0.03316
Mefv	3.66326	5.13992	0.000518279	0.0470175
AI662270	3.64146	4.81232	4.63e-05	0.0113465
Gbp2	3.62899	5.7464	0.000170772	0.0240396
Samd9l	3.5868	6.03917	2.57e-05	0.00767183
Aspm	3.55553	5.0372	8.51e-05	0.015705
Fn1	3.54758	9.96714	0.00029856	0.033344
AB124611	3.54385	5.3912	4.86e-05	0.0114572
Mndal	3.52164	5.04063	0.000478323	0.0440453
Atp1a3	3.51481	6.75464	1.89e-07	0.000462352
Atrnl1	3.50481	5.40008	3.82e-05	0.00974983
Pim1	3.44677	6.63725	4.42e-06	0.00270625
Plekhg3	3.42346	5.7593	0.000245559	0.0297758
Fgl2	3.40845	5.49933	5.19e-05	0.011768
Gm1966	3.38294	7.86318	9.5e-06	0.00415737
Kcnab2	3.36343	5.5218	4.84e-05	0.0114572
Pyhin1	3.35081	5.63732	8.23e-06	0.00373211
S100a11	3.33507	5.91489	0.00022176	0.0277132
Ptger4	3.33485	4.95031	0.000102977	0.0173589
H2-Aa	3.30935	7.68172	0.00010367	0.0173589
H2-Eb1	3.30048	7.86547	9.65e-07	0.00107479
Anxa2	3.29098	5.67889	0.000173382	0.0241296
Vcan	3.28762	5.58511	0.000130464	0.0204845
Cybb	3.27786	8.57761	6.15e-05	0.0134443
H2-Ab1	3.26432	8.48874	1.81e-06	0.00146212
Rab3d	3.23675	4.80745	0.000210265	0.0268241
Sik1	3.22989	7.12851	0.000239211	0.0292961
Ptpn22	3.21874	4.97761	0.000548828	0.0488631
Lyz2	3.19117	10.466	7.29e-05	0.0146031
Cd74	3.18103	9.7269	7.94e-05	0.0152018
Clec7a	3.17655	6.13293	3.83e-06	0.00260854
Ifi203	3.16927	5.3863	0.000382118	0.0374384
Tmsb10	3.15159	7.64849	3.67e-05	0.00974983
Myof	3.14362	5.39198	0.000314342	0.034152
Msrb1	3.14059	4.96865	0.000372484	0.0370879
Hp	3.09778	6.15179	9.47e-05	0.0168108
Sp100	3.07631	6.4871	7.37e-06	0.00373211
Pstpip1	3.05677	5.67155	0.000528619	0.047603
Syne1	3.04483	8.42152	0.000550592	0.0488631
Il1b	2.95211	7.15198	2.24e-05	0.00713716
Gas7	2.90359	5.81415	0.000270543	0.031258
Pirb	2.89739	6.48317	1.48e-05	0.00566056
Plec	2.88116	8.17038	6.69e-05	0.0136639
Helz2	2.88086	6.10791	0.000202981	0.0267302
Capn2	2.85983	5.73556	0.000162832	0.0234612
Gsr	2.85963	6.90742	0.000205225	0.0267383
Iqgap2	2.8563	6.8714	0.000154565	0.0225352
Mki67	2.82931	8.61139	0.000340033	0.0354764
Top2a	2.82036	6.82599	0.000255149	0.0303379
Cd93	2.77133	5.76655	2.4e-05	0.00734296
Tpm4	2.75016	6.89223	2.67e-07	0.00046762
Lmnb1	2.74543	6.59936	8.59e-05	0.015705
Lsp1	2.74274	7.84314	5.63e-06	0.00328619
Axl	2.70836	6.58676	1.87e-06	0.00146212
Hip1	2.65362	6.04341	0.000261965	0.0308489
AI607873	2.62208	6.05113	0.000145455	0.0217242
Slfn2	2.58503	6.46214	1.09e-05	0.00445098
Anxa5	2.56916	5.70591	0.000208414	0.0268241
Pygl	2.56604	6.20757	0.000101862	0.0173589
Rftn1	2.56447	5.33774	0.000368228	0.0370879
F13a1	2.54492	8.18812	7.51e-05	0.0146031
Samhd1	2.47334	8.9243	0.000168124	0.023942
Flna	2.46004	9.74644	0.000354592	0.0361896
Ms4a6c	2.44072	6.27222	0.000140353	0.021221
Cd52	2.3892	6.12108	0.000565166	0.0493943
Apoe	2.31211	11.9634	0.000463341	0.0433171
Clic4	2.27861	5.60968	0.000560904	0.0493943
Mbp	2.15997	6.46222	6.58e-05	0.0136639
Hmgb2	2.03588	8.1224	0.000249325	0.0299361
Tgfbi	1.94965	8.18332	0.000568677	0.0493943
Nap1l1	1.80242	6.96658	0.000453634	0.0427358
Gpr34	-1.71605	8.4049	0.000448861	0.0427358
P2ry13	-1.72716	8.60369	0.000441267	0.0425527
Sgk1	-1.75144	8.72623	0.000325279	0.0346408
Bag3	-2.11503	7.07263	3.69e-05	0.00974983
P3h2	-2.33046	6.61043	1.39e-05	0.00548864
Hsph1	-2.48746	8.07924	1.67e-06	0.00146212
Hspa1a	-2.80617	9.78338	5.32e-08	0.000162987
Peg10	-2.82699	5.43614	9.1e-05	0.016391
Hspa1b	-3.0818	10.0724	1.26e-08	5.97e-05
Hspb1	-3.16038	4.71895	0.00047455	0.0440289
Gpr165	-3.36333	5.10393	0.000341816	0.0354764
Smim10l2a	-8.80061	2.82443	0.000317901	0.034152
